# Supplementary material
Source: publisher site journal article supplement (https://www.dovepress.com/article/571202)
Supplement: Supplementary file 1 [file 571202%20Revised%20supplementary%20material.docx]

**Supplementary material**

**Table S1** Clinical characteristics of participants stratified by the presence of ≥50% stenosis.

| **Variable** | **Total**  **(n = 5444)** | **<50% Stenosis**  **(n = 2268)** | **≥50% Stenosis**  **(n = 3176)** | ***p* value** |
| --- | --- | --- | --- | --- |
| Age (years) | 65.00(57.00, 72.00) | 65.00(57.00, 72.00) | 65.00(57.00, 72.00) | 0.297 |
| RBC(× 109/L) | 4.30(3.95, 4.63) | 4.30(3.96, 4.63) | 4.29(3.94, 4.62) | 0.098 |
| WBC(× 109/L) | 6.21(5.23, 7.60) | 6.01(5.10, 7.21) | 6.40(5.34, 7.90) | **<0.001** |
| ALT(U/L) | 18.00(13.00, 26.00) | 17.00(13.00, 25.00) | 18.00(13.00, 27.00) | **<0.001** |
| TBIL(μmol/L) | 12.20(9.50, 15.80) | 12.50(9.80, 16.00) | 12.00(9.30, 15.70) | **<0.001** |
| TP(g/L) | 65.00(61.50, 69.10) | 65.40(61.90, 69.70) | 64.75(61.10, 68.60) | **<0.001** |
| CREA(μmol/L) | 70.50(59.90, 83.50) | 68.85(58.00, 81.10) | 71.80(61.10, 85.12) | **<0.001** |
| UA(μmol/L) | 337.60(276.77, 408.30) | 343.20(281.27, 414.47) | 334.30(271.58, 404.57) | **<0.001** |
| CHOL(mmol/L) | 4.19(3.51, 4.89) | 4.26(3.65, 4.99) | 4.18(3.40, 4.83) | **<0.001** |
| HDL(mmol/L) | 1.01(0.87, 1.18) | 1.04(0.90, 1.25) | 0.99(0.85, 1.13) | **<0.001** |
| LDL(mmol/L) | 2.51(1.93, 3.10) | 2.52(2.01, 3.17) | 2.51(1.88, 3.04) | **<0.001** |
| TG(mmol/L) | 1.32(0.99, 1.79) | 1.32(0.98, 1.79) | 1.32(1.01, 1.79) | 0.088 |
| GLU(mmol/L) | 5.27(4.74, 6.43) | 5.15(4.69, 5.95) | 5.38(4.80, 6.81) | **<0.001** |
| DD(ng/ml) | 126.00(76.00, 226.00) | 122.00(69.00, 206.00) | 127.00(82.00, 242.25) | **<0.001** |
| FIB(mg/dL) | 315.00(273.00, 368.00) | 306.00(266.00, 351.00) | 321.00(281.00, 379.00) | **<0.001** |
| SOD(kU/L) | 163.20(148.50, 176.80) | 163.20(152.60, 179.83) | 162.90(146.00, 174.30) | **<0.001** |
| ln-SIRI | 0.15(-0.27, 0.61) | 0.00(-0.39, 0.41) | 0.25(-0.16, 0.76) | **<0.001** |
| ln-SII | 6.16(5.79, 6.58) | 6.04(5.69, 6.42) | 6.25(5.86, 6.67) | **<0.001** |
| SIRI | 1.16(0.76, 1.83) | 1.00(0.67, 1.51) | 1.28(0.85, 2.13) | **<0.001** |
| SII | 475.29(326.39, 717.99) | 421.92(295.14, 615.55) | 517.36(349.63, 787.71) | **<0.001** |
| Male(%) | 3545(65%) | 1321(58%) | 2224(70%) | **<0.001** |
| Hypertension(%) | 3448(63%) | 1276(56%) | 2172(68%) | **<0.001** |
| Diabetes(%) | 1644(30%) | 526(23%) | 1118(35%) | **<0.001** |
| CHD(%) | 525(10%) | 182(8%) | 343(11%) | **<0.001** |
| Hyperlipidemia(%) | 2794(51%) | 1092(48%) | 1702(54%) | **<0.001** |
| AIS(%) | 1852(34%) | 428(19%) | 1424(45%) | **<0.001** |

**Notes:** Bold for p-values less than 0.05.

**Abbreviations:** SIRI, Systemic Inflammatory Response Index; SII, Systemic Immune-Inflammation Index; RBC, Red Blood Cell; WBC, White Blood Cell; ALT, Alanine Aminotransferase; TBIL, Total Bilirubin; TP, Total Protein; CREA, Creatinine; UA, Uric Acid; CHOL, Cholesterol; HDL, High-Density Lipoprotein Cholesterol; LDL, Low-Density Lipoprotein Cholesterol; TG, Triglycerides; GLU, Glucose; DD, D-Dimer; FIB, Fibrinogen; SOD, Superoxide Dismutase; CHD, Coronary Heart Disease; AIS, Acute Ischemic Stroke.

**Table S2** ROC analysis of ln‑SIRI, ln‑SII for identifying cerebral atherosclerotic stenosis

| Model / Index | AUC | AUC 95%CI | Optimal Cut-off | Sensitivity | Specificity |
| --- | --- | --- | --- | --- | --- |
| Unadjusted | | | | | |
| ln-SIRI | 0.613 | 0.598-0.628 | 0.21 | 0.532 | 0.64 |
| ln-SII | 0.596 | 0.580-0.611 | 6.229 | 0.514 | 0.635 |
| Adjusted | | | | | |
| ln-SIRI | 0.699 | 0.686-0.713 | 0.56 | 0.663 | 0.667 |
| ln-SII | 0.698 | 0.684-0.712 | 6.254 | 0.665 | 0.63 |

Models were adjusted for age, gender, hypertension, diabetes, coronary heart disease, hyperlipidemia, acute stroke, ALT, creatinine and D-Dimer.

**Table S3** Sensitivity analysis: associations of ln‑SIRI and ln‑SII with the presence, severity, and extent of cerebral atherosclerosis after excluding specific subgroups

| **Variable** | **Main Analysis**  **(Full Cohort)** | | **Sensitivity Analysis**  **(Excluding DSA)** | | **Sensitivity Analysis**  **(Excluding Acute Stroke)** | |
| --- | --- | --- | --- | --- | --- | --- |
| OR (95% CI) | *p* value | OR (95% CI) | *p* value | OR (95% CI) | *p* value |
| **ln-SIRI** | | | | | | |
| Presence | 1.27(1.19-1.35) | <0.001 | 1.26(1.17-1.36) | <0.001 | 1.24(1.15-1.33) | <0.001 |
| Severity | 1.29(1.22-1.36) | <0.001 | 1.26(1.18-1.36) | <0.001 | 1.22(1.15-1.30) | <0.001 |
| Extent | 1.27(1.20-1.34) | <0.001 | 1.27(1.19-1.36) | <0.001 | 1.26(1.18-1.34) | <0.001 |
| **ln-SII** | | | | | | |
| Presence | 1.22(1.15-1.30) | <0.001 | 1.19(1.11-1.28) | <0.001 | 1.18(1.10-1.26) | <0.001 |
| Severity | 1.26(1.20-1.33) | <0.001 | 1.22(1.14-1.29) | <0.001 | 1.19(1.12-1.26) | <0.001 |
| Extent | 1.24(1.18-1.31) | <0.001 | 1.21(1.14-1.30) | <0.001 | 1.23(1.16-1.31) | <0.001 |

Models were adjusted for age, gender, hypertension, diabetes, coronary heart disease, hyperlipidemia, ALT, creatinine and D-Dimer. For the analysis excluding patients who underwent DSA, acute stroke status was additionally adjusted.

**Table S4** Associations of cerebral atherosclerosis with log‑transformed and untransformed inflammatory indices.

| Variable | ln-SIRI  OR (95% CI) | SIRI  OR (95% CI) | ln-SII  OR (95% CI) | SII  OR (95% CI) |
| --- | --- | --- | --- | --- |
| Presence | 1.27(1.19-1.35) | 1.29(1.19-1.41) | 1.22(1.15-1.30) | 1.20(1.11-1.30) |
| Severity | 1.29(1.22-1.36) | 1.29(1.21-1.37) | 1.26(1.20-1.33) | 1.22(1.15-1.29) |
| Extent | 1.27(1.20-1.34) | 1.23(1.16-1.31) | 1.24(1.18-1.31) | 1.18(1.12-1.25) |

Models were adjusted for age, gender, hypertension, diabetes, coronary heart disease, hyperlipidemia, acute stroke, ALT, creatinine and D-Dimer.


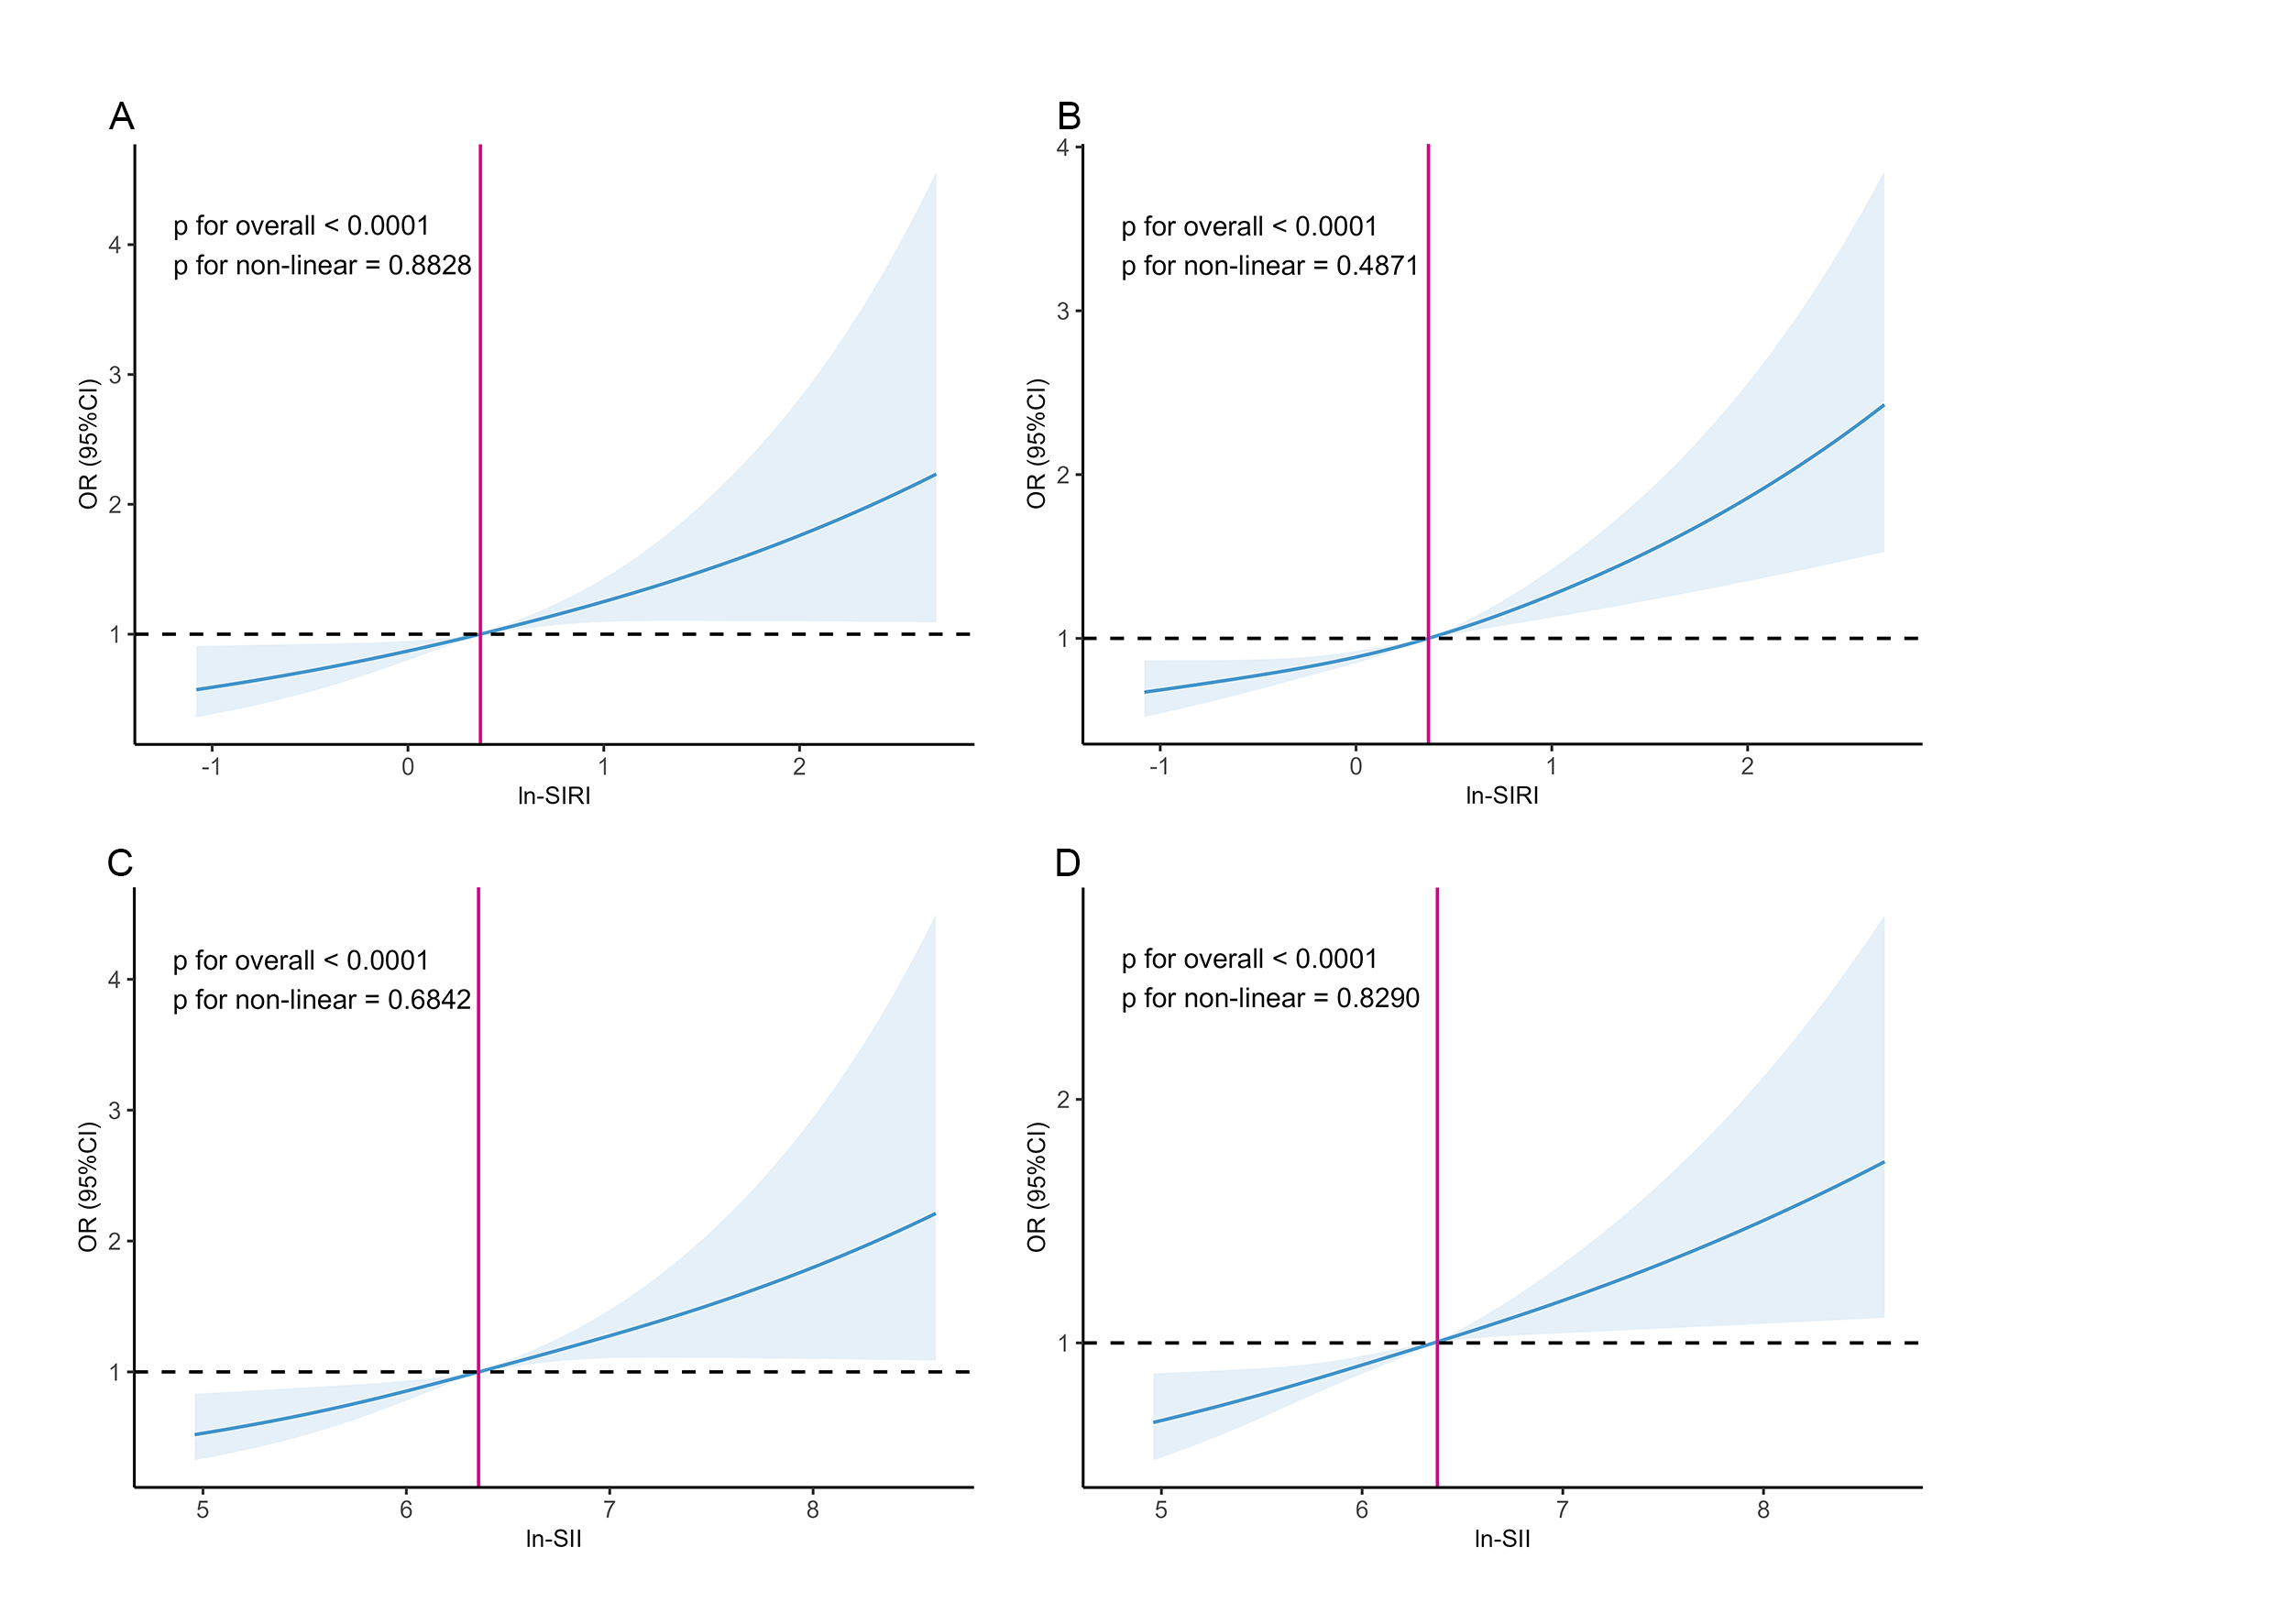
**Figure S1**  RCS analysis for the association between ln-SIRI, ln-SII and the presence of cerebral artery stenosis in patients with and without acute stroke. (A) Association between ln-SIRI and stenosis in patients with acute stroke. (B) Association between ln-SIRI and stenosis in patients without acute stroke. (C) Association between ln-SII and stenosis in patients with acute stroke. (D) Association between ln-SII and stenosis in patients without acute stroke. All models adjusted for age, sex, hypertension, diabetes, coronary heart disease, hyperlipidemia, acute stroke, ALT, creatinine, and D‑dimer.


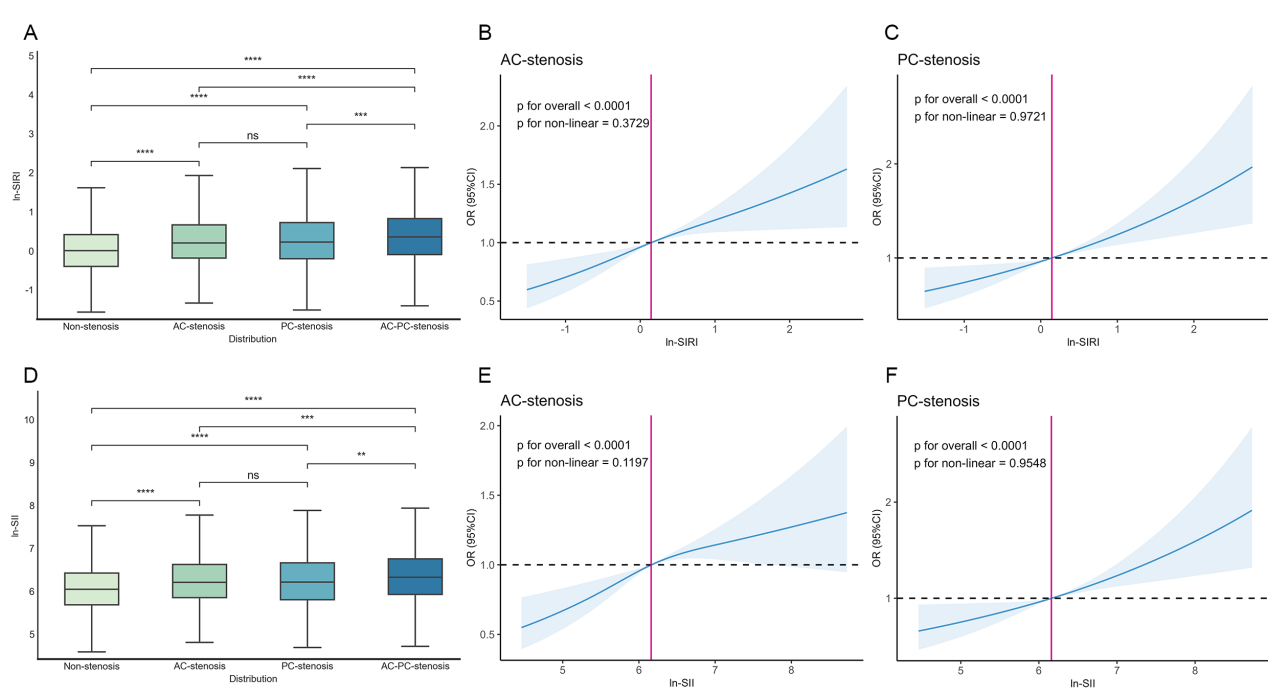


**Figure S2** Association between ln-SIRI, ln-SII and the distribution of cerebral artery stenosis.

Distribution of ln-SIRI (A) and ln-SII (D) across stenosis groups: non-stenosis, AC-stenosis, PC-stenosis, and AC-PC-stenosis. Restricted cubic spline (RCS) analysis of ln-SIRI with presence of anterior (B) and posterior (C) circulation arterial stenosis. RCS analysis of ln-SII with presence of anterior (E) and posterior (F) circulation arterial stenosis. All models adjusted for age, gender, hypertension, diabetes, coronary heart disease, hyperlipidemia, acute stroke, ALT, creatinine and D-Dimer. Abbreviations: Non-stenosis: no stenosis ≥50%  in any artery; AC-stenosis: ≥50% stenosis exclusively in the anterior circulation; PC-stenosis: ≥50% stenosis exclusively in the posterior circulation; AC-PC-stenosis: stenosis ≥50% in both anterior and posterior circulation. p-value annotation legend: ns: 0.05 < p ≤ 1; *: 0.01 < p ≤ 0.05; **: 0.001 < p ≤ 0.01; ***: 0.0001 < p ≤ 0.001; ****: p ≤0.0001.
